# Supplementary material
Source: PubMed Central journal article supplement (PMC6768830)
Supplement: NIHMS1524432-supplement-5.pdf [file NIHMS1524432-supplement-5.pdf]

# IGF2BP3 Protein expression (44 Tissues)

A

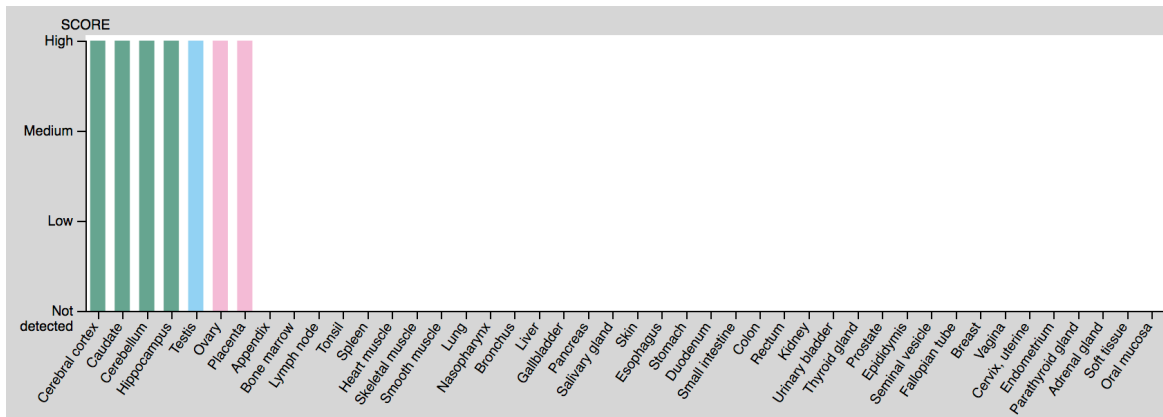

B

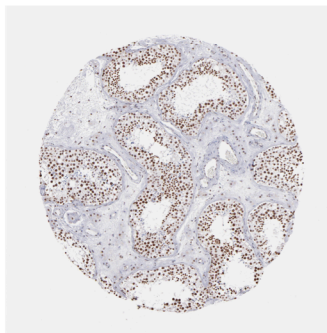

Testis  
(Normal tissue)

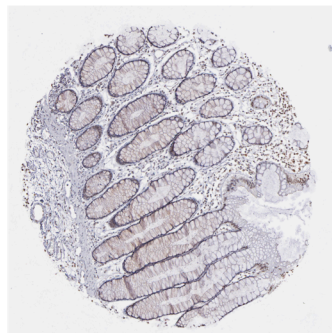

Colon  
(Normal tissue)

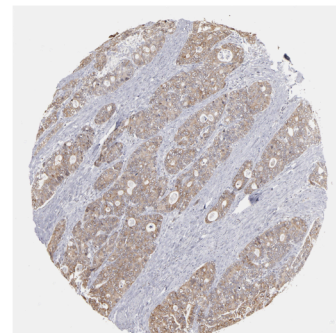

Colon  
(Adenocarcinoma)
