# Supplementary material
Source: PubMed Central journal article supplement (PMC6768830)

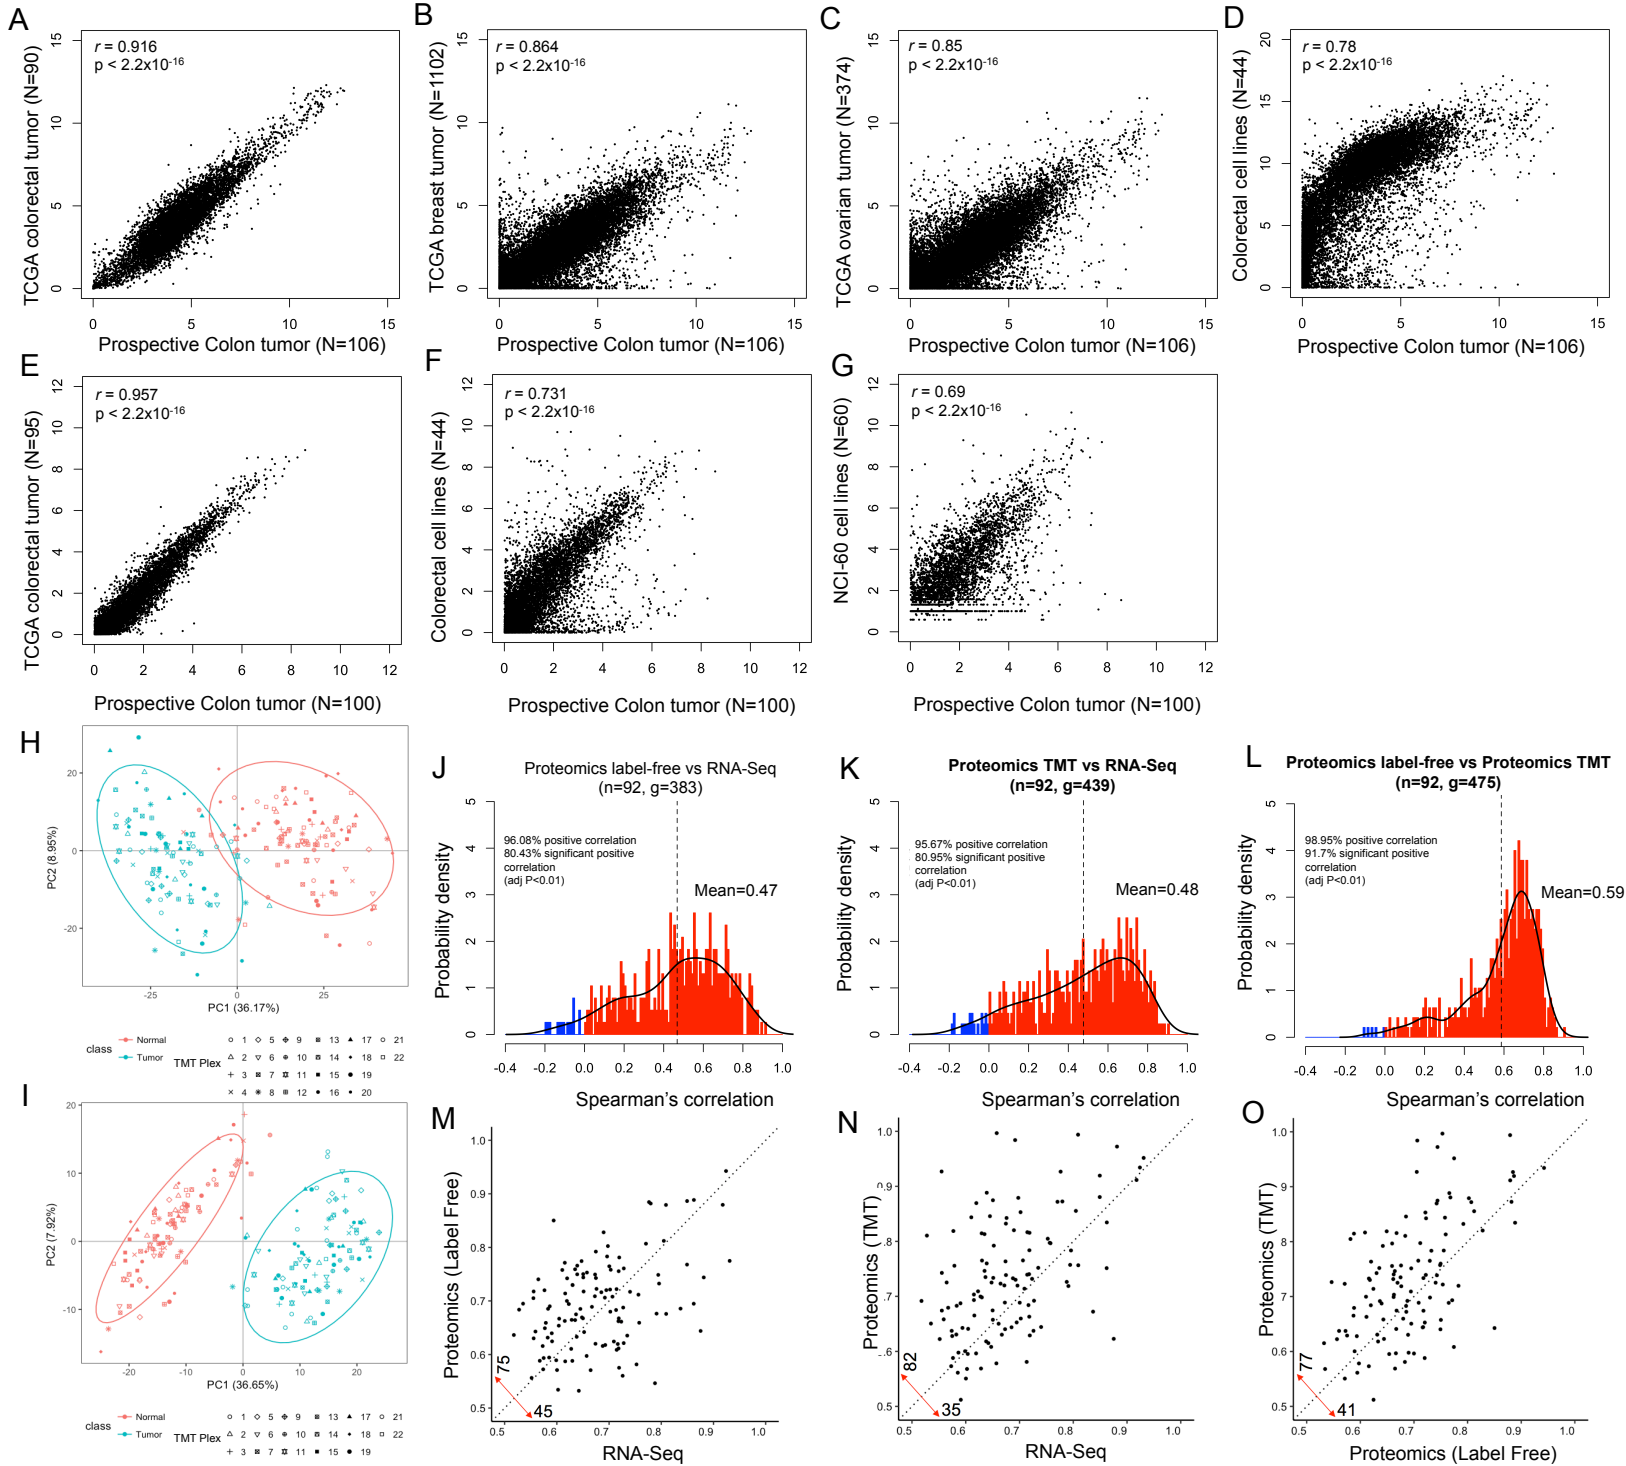

Supplement: NIHMS1524432-supplement-1.pdf [file NIHMS1524432-supplement-1.pdf]

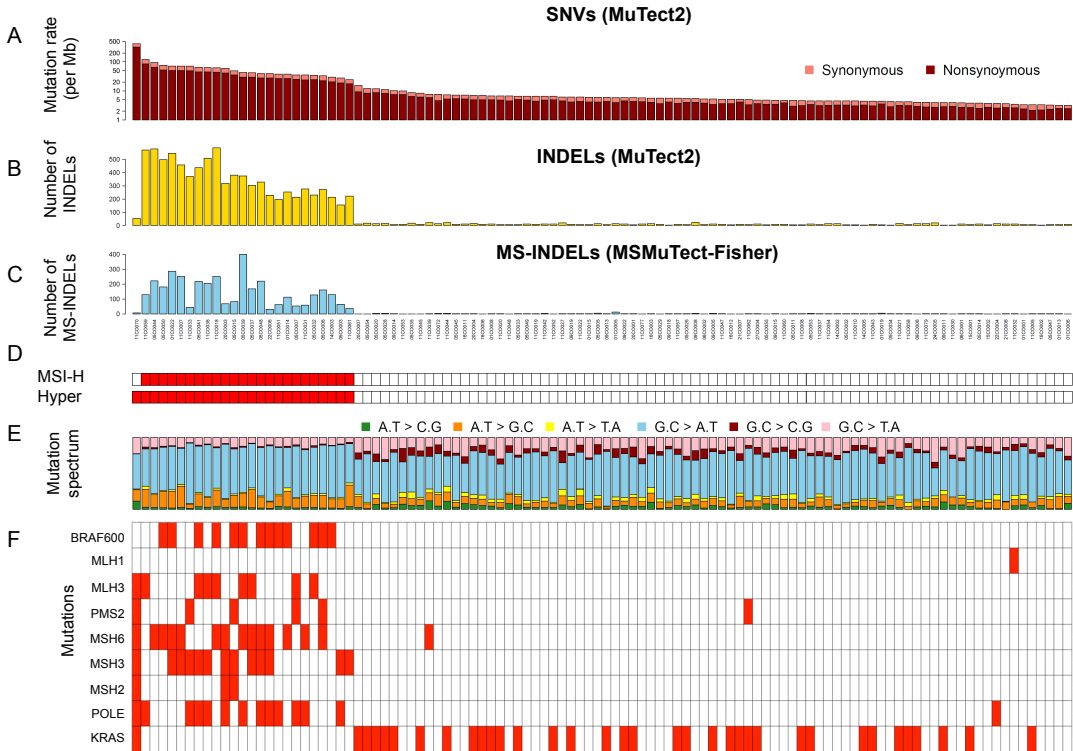

Supplement: NIHMS1524432-supplement-2.pdf [file NIHMS1524432-supplement-2.pdf]

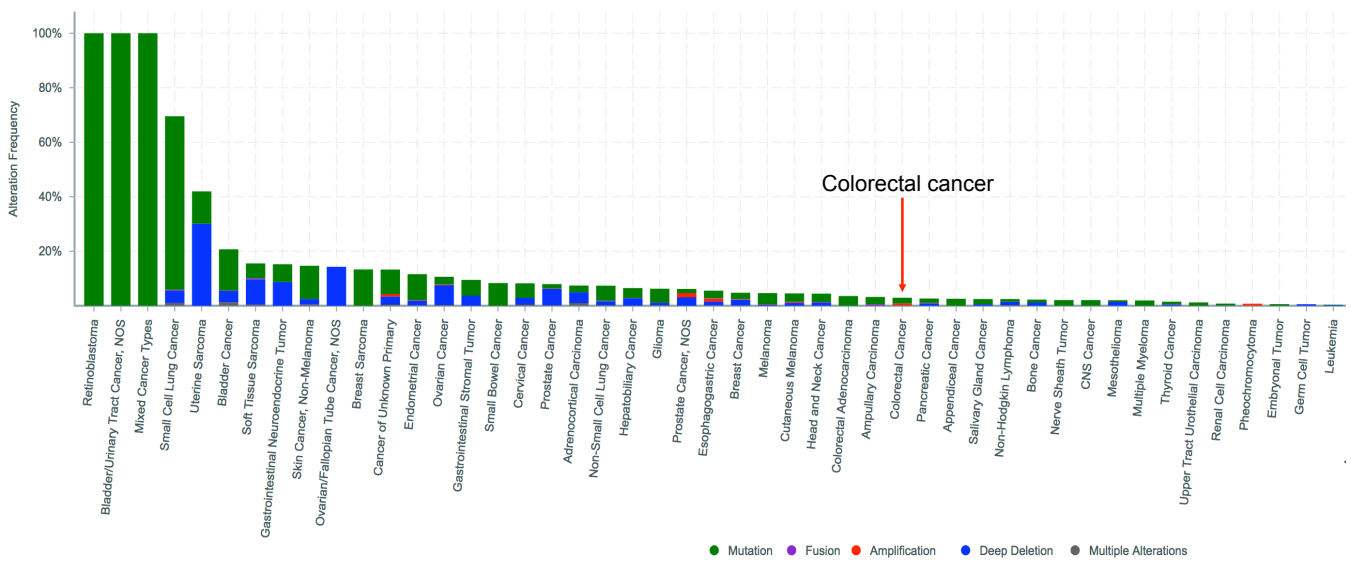

Supplement: NIHMS1524432-supplement-3.pdf [file NIHMS1524432-supplement-3.pdf]

A

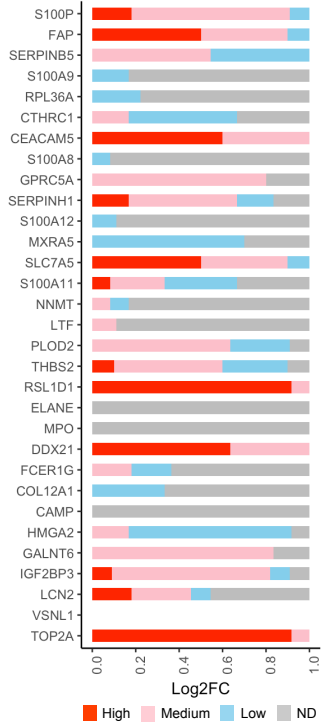

B

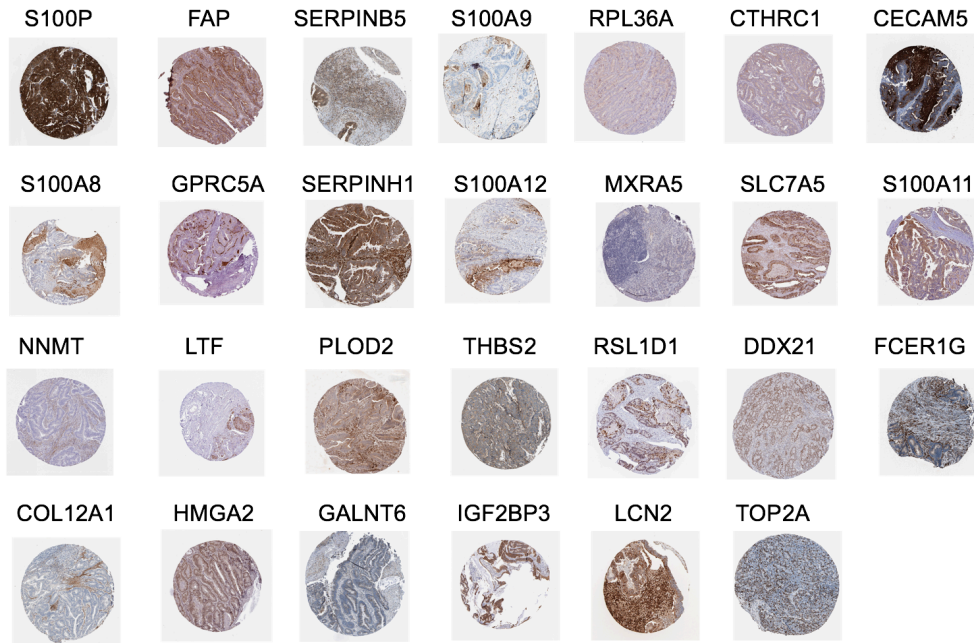

Supplement: NIHMS1524432-supplement-4.pdf [file NIHMS1524432-supplement-4.pdf]

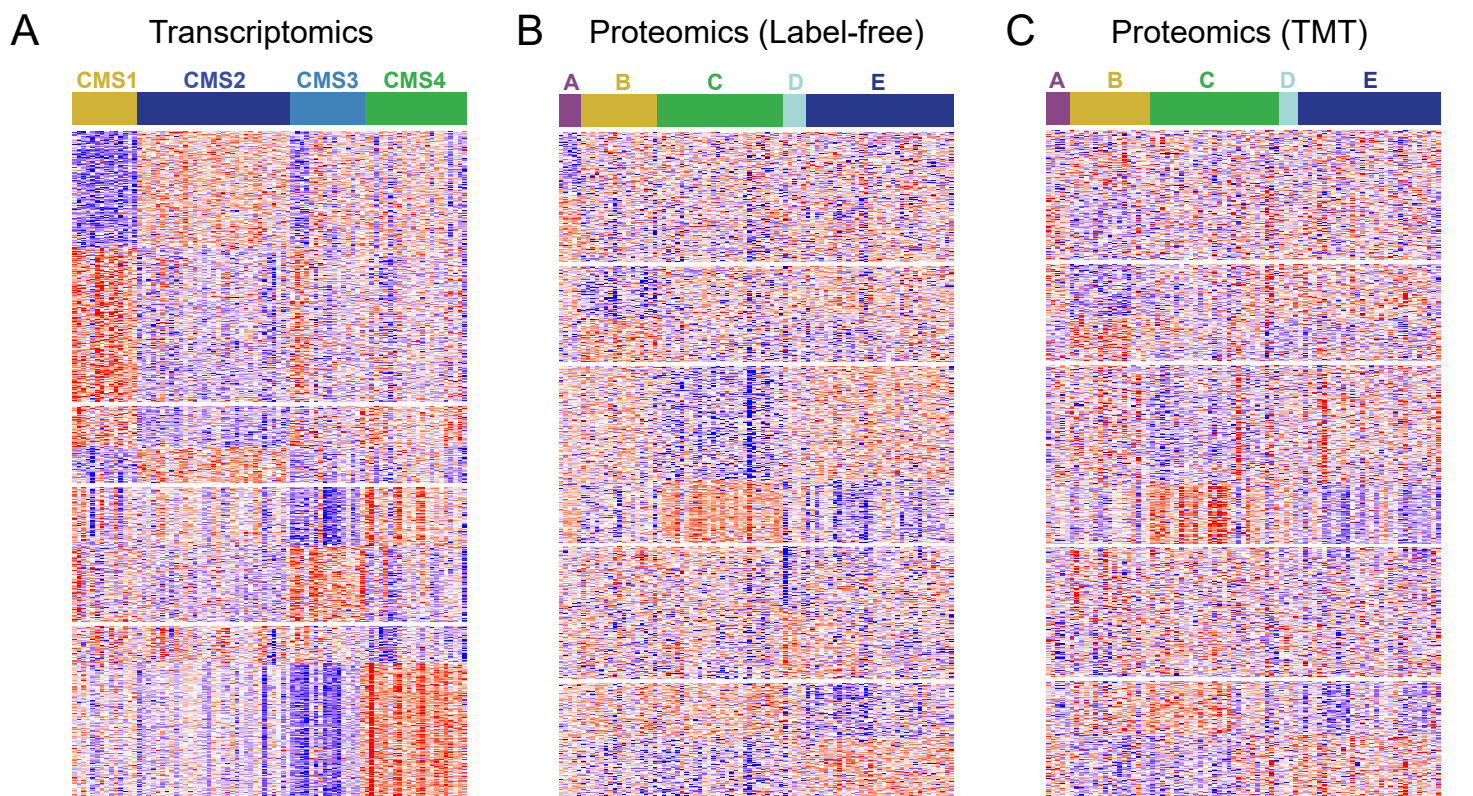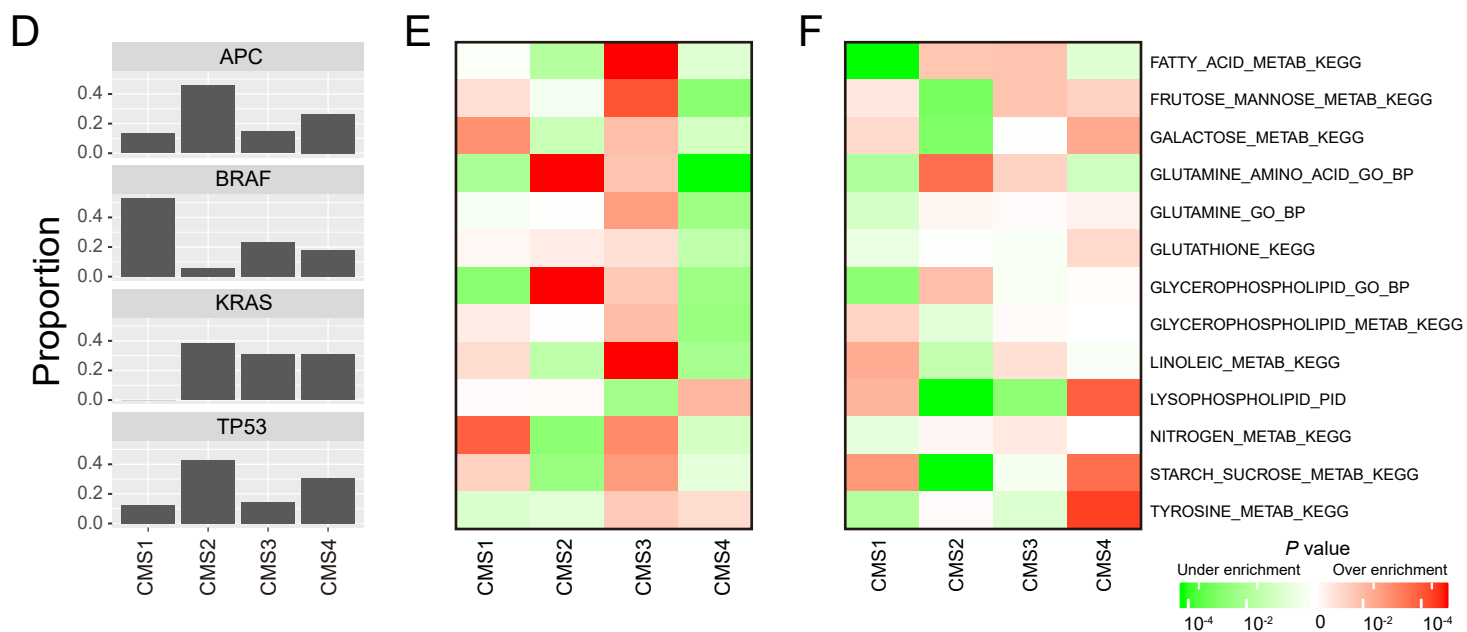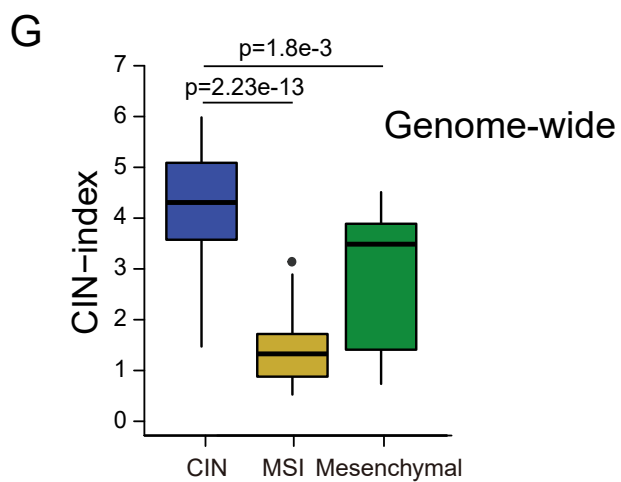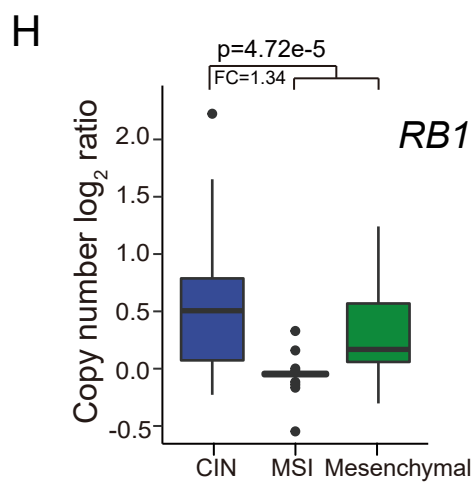

Supplement: NIHMS1524432-supplement-6.pdf [file NIHMS1524432-supplement-6.pdf]

All Samples

$\rho = 0.16$ ;  $p = 0.13$

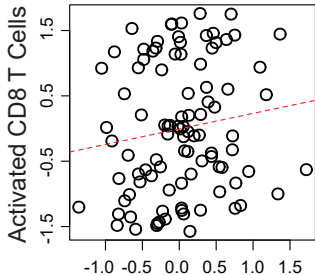

MSI

$\rho = -0.61$ ;  $p = 0.02$

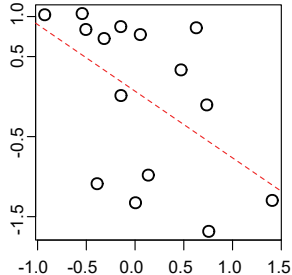

CIN

$\rho = 0.002$ ;  $p = 0.99$

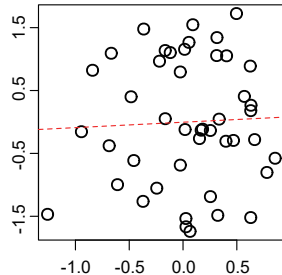

Mesenchymal

$\rho = 0.05$ ;  $p = 0.85$

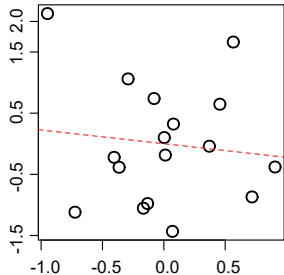

Glycolytic Activity

Supplement: NIHMS1524432-supplement-7.pdf [file NIHMS1524432-supplement-7.pdf]
